# Supplementary material for: Effects of adjusting nickel pulse count on NiOx films prepared by atomic layer deposition
Source: Royal Society of Chemistry journal article supplement (doi:10.1039/d4cp03553d), 2024-01-01
Supplement: d4cp03553d1.pdf [file d4cp03553d1.pdf]

**Supplementary diagram:**

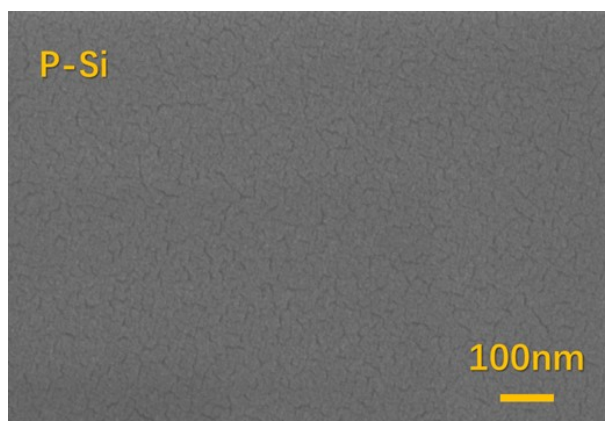

**Fig.S1.** The SEM image of the cleaned P-si.

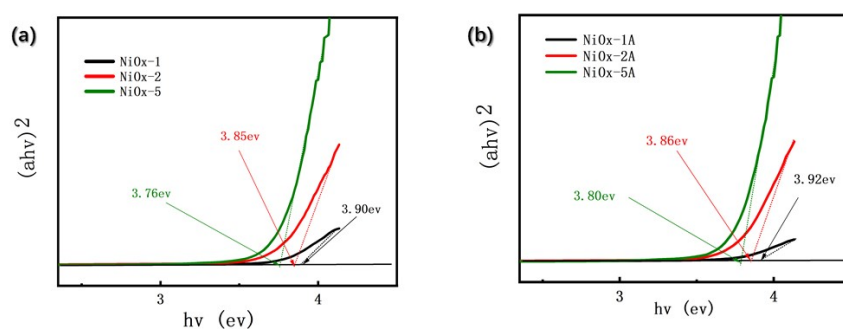

**Fig.S2.** The bandgap widths of different NiOx films

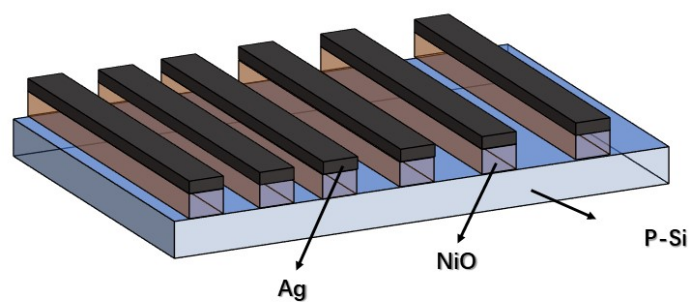

**Fig.S3.** The structures of the test of the contact resistance

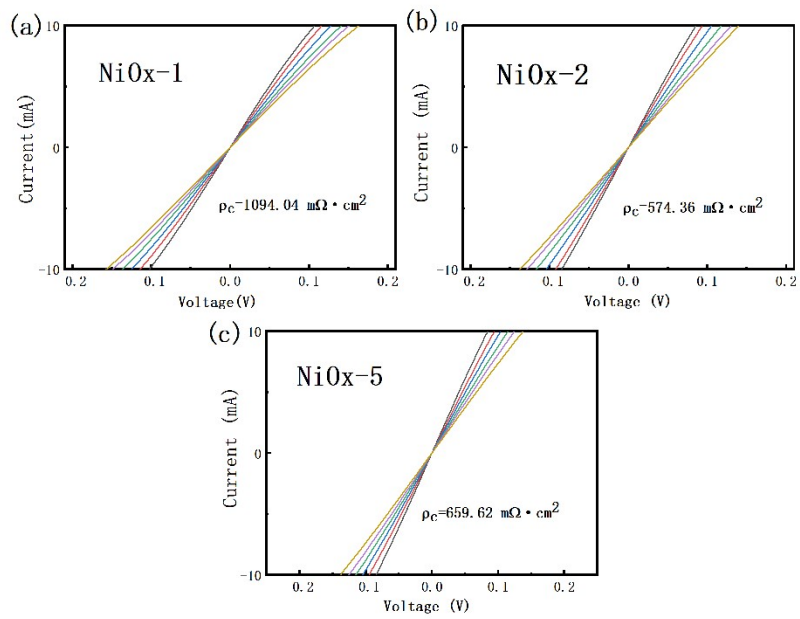

**Fig S4 (a)-(d). Contact resistivity test for NiOx-1, NiOx-2, NiOx-5**

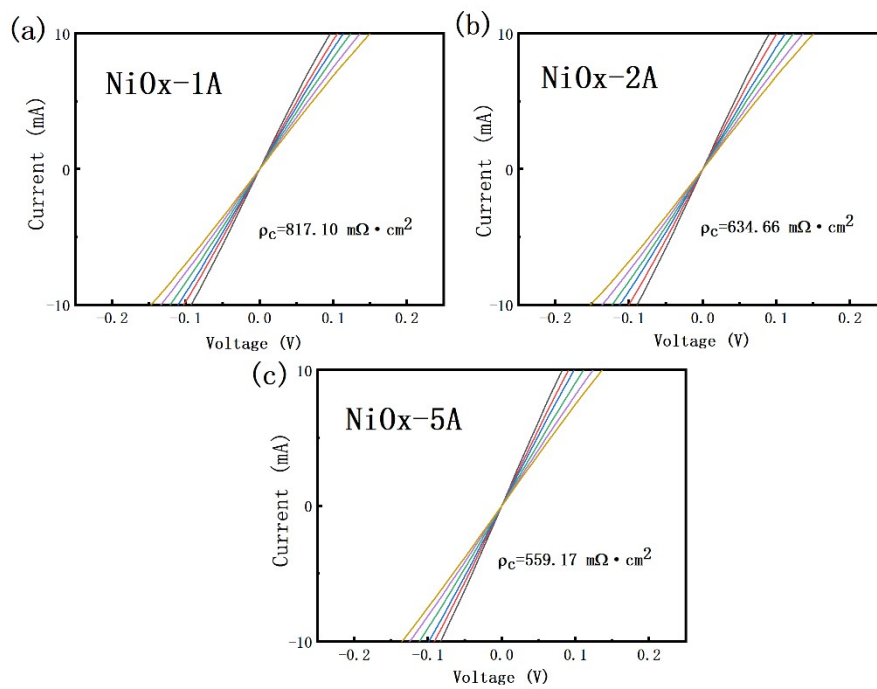

**Fig S5 (a)-(d). Contact resistivity test for NiOx-1A, NiOx-2A, NiOx-5A**

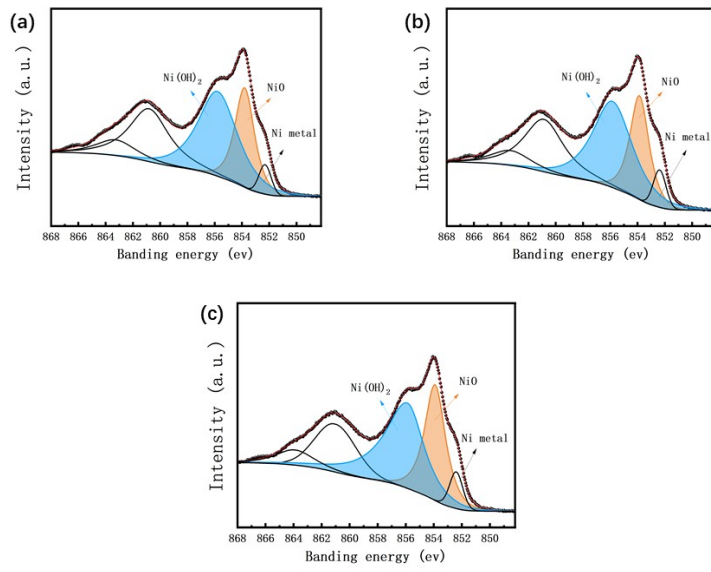

**FigS6(a)-(c) XPS test of NiOx-1A, NiOx-2A, NiOx-5A**
